# Supplementary material for: Reduced graphene oxide-wrapped Fe–Fe3O4@mSiO2 hollow core–shell composites with enhanced electromagnetic wave absorption properties
Source: Royal Society of Chemistry journal article supplement (doi:10.1039/d2tc02536a), 2022-01-01
Supplement: d2tc02536a1.pdf [file d2tc02536a1.pdf]

# Reduced Graphene Oxide-wrapped Fe-Fe<sub>3</sub>O<sub>4</sub>@mSiO<sub>2</sub> Hollow Core-shell Composites with Enhanced Electromagnetic Wave Absorption Properties

Yuanyuan Zhang,<sup>‡a</sup> Yange Yu,<sup>‡a</sup> Yong Yuan,<sup>c</sup> Xueyin Sun,<sup>\*a</sup> Wenzhu Shao,<sup>ab</sup> Liang Zhen<sup>ad</sup> and Jiantang Jiang<sup>\*ab</sup>

<sup>a</sup> School of Materials Science and Engineering, Harbin Institute of Technology, Harbin, 150001, China.  
E-mail: 13944139606@163.com, jjtcy@hit.edu.cn

<sup>b</sup> National Key Laboratory of Precision Hot Processing of Metals, Harbin Institute of Technology, Harbin, 150001, China

<sup>c</sup> Precision Machinery Research Institutes of Shanghai Space Flight Academy, Shanghai, 201600, China

<sup>d</sup> Sauvage Laboratory for Smart Materials, School of Materials Science and Engineering Harbin Institute of Technology (Shenzhen), Shenzhen, 518055, China

<sup>‡</sup> These authors contributed equally to this work and should be considered co-first authors.

## Abstract

The Fe/Fe<sub>3</sub>O<sub>4</sub> nanocomposite with mesoporous silica (mSiO<sub>2</sub> for short) shell was successfully prepared by solvothermal reaction combined with hydrogen-thermal annealing (550 °C). Further, reduced graphene oxide (RGO) was introduced to obtain Fe-Fe<sub>3</sub>O<sub>4</sub>@mSiO<sub>2</sub>@RGO hollow core-shell composites with hollow structure by Aerogel method utilizing home-made equipment. The introduction of mSiO<sub>2</sub> on the surface of Fe<sub>3</sub>O<sub>4</sub> constructed a ventilated framework, which thereafter maintained the dispersion of fine Fe particles emerging from the reduction process. The transformation from Fe<sub>3</sub>O<sub>4</sub> to Fe nanoparticles enhanced the ferromagnetic loss, while the introduction of high conductivity RGO also enhanced the polarization relaxation and conductivity loss. Meanwhile, the unique hollow structure of the core-shell structure effectively reduces the density of the ferromagnetic composites (Fe-Fe<sub>3</sub>O<sub>4</sub>@mSiO<sub>2</sub>) without sacrificing the contact between RGO and nanoparticles, adding more surfaces/interfaces. Fe-Fe<sub>3</sub>O<sub>4</sub>@mSiO<sub>2</sub>@RGO exhibited excellent

electromagnetic wave absorbing performances. The coating using Fe-Fe<sub>3</sub>O<sub>4</sub>@mSiO<sub>2</sub>@RGO as fillers exhibits a minimum reflection loss of -66.24 dB with an effective absorption bandwidth of 5.31 GHz with a sample thickness of only 1.79 mm. The hollow core-shell structure of RGO-wrapped Fe-Fe<sub>3</sub>O<sub>4</sub>@mSiO<sub>2</sub> demonstrates a promising approach for the design of lightweight and high-performance electromagnetic absorption materials.

**Keywords**

Electromagnetic absorption; Hollow core-shell structure; Reduced graphene oxide; Ferrites/ferromagnetic metal

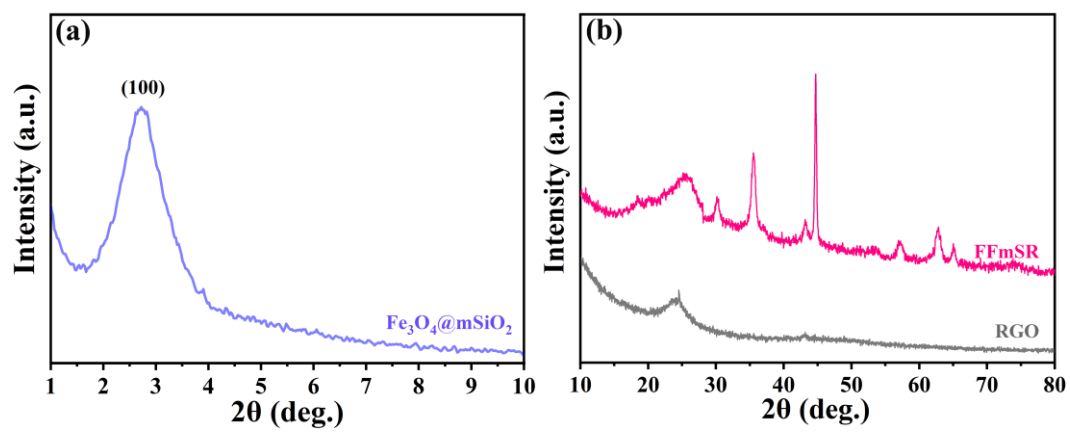

**Fig. S1** (a) low-angle XRD patterns of  $\text{Fe}_3\text{O}_4@\text{mSiO}_2$ . (b) XRD patterns RGO and FFmSR.

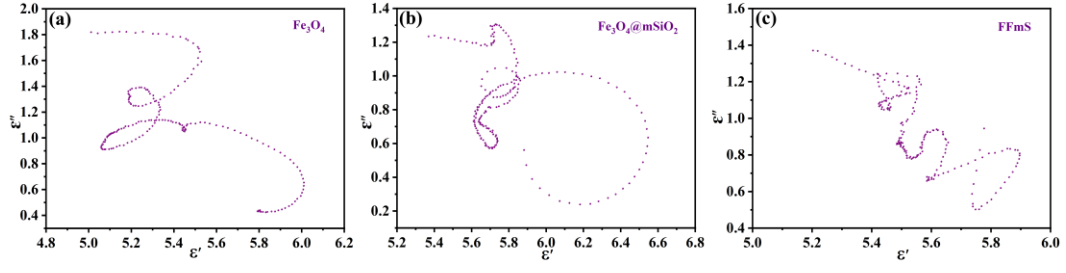

**Fig. S2** The  $\epsilon''$  versus  $\epsilon'$  of (a)  $\text{Fe}_3\text{O}_4$ , (b)  $\text{Fe}_3\text{O}_4@\text{mSiO}_2$  and (c) FFmS.

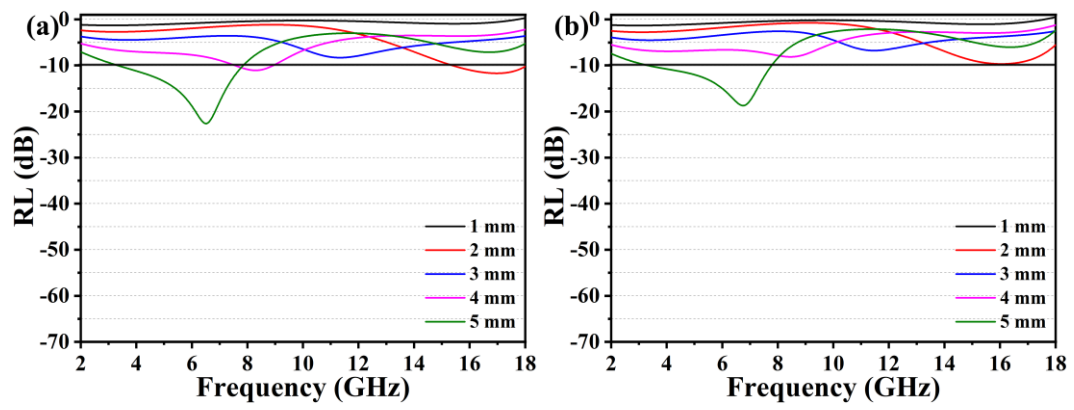

**Fig. S3** Reflection loss versus frequency plot of (a)  $\text{Fe}_3\text{O}_4$ , (b)  $\text{Fe}_3\text{O}_4@\text{mSiO}_2$  in the frequency range of 2-18 GHz.

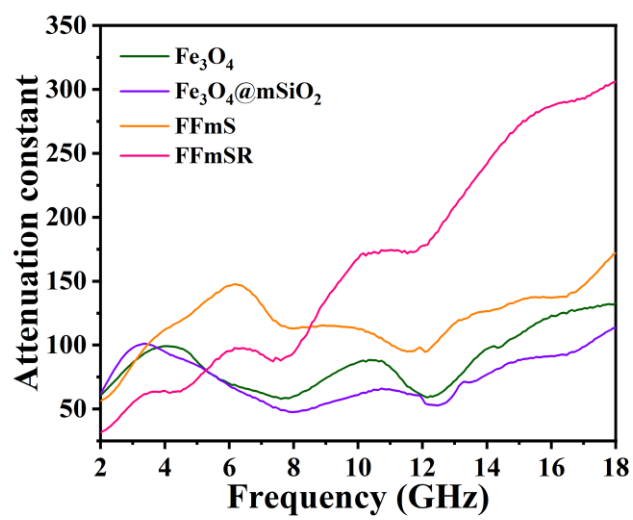

**Fig. S4** Frequency-dependent attenuation constant of  $\text{Fe}_3\text{O}_4$ ,  $\text{Fe}_3\text{O}_4@\text{mSiO}_2$ , FFmS and FFmSR.

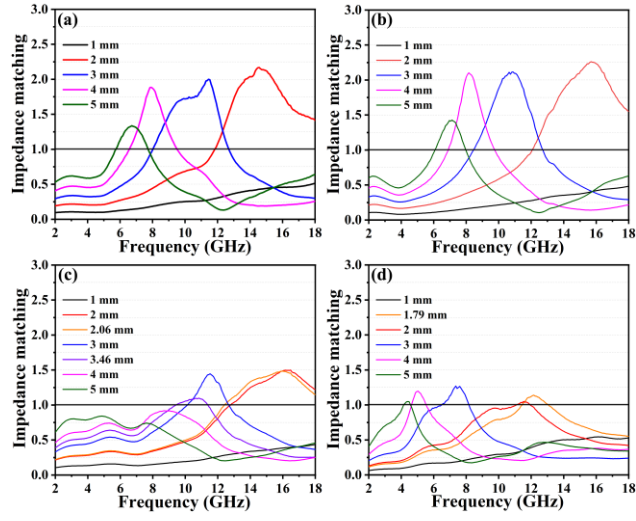

**Fig. S5** Impedance matching of  $\text{Fe}_3\text{O}_4$  (a),  $\text{Fe}_3\text{O}_4@\text{mSiO}_2$  (b), FFmS (c) and FFmSR (d) with different thicknesses.

**Table 1.** Microwave Absorption Performance of Similar Composites.

| <b>Sample</b>                                               | <b><math>RL_{\min}</math><br/>(dB)</b> | <b><math>f_{\text{EAB}}</math><br/>(GHz)</b> | <b>Thickness<br/>(mm)</b> | <b>Filler loading<br/>(wt.%)</b> | <b>Refs.</b> |
|-------------------------------------------------------------|----------------------------------------|----------------------------------------------|---------------------------|----------------------------------|--------------|
| <b>Fe<sub>3</sub>O<sub>4</sub>@mSiO<sub>2</sub></b>         | -38.7                                  | 4.00                                         | 2.0                       | 25                               | 50           |
| <b>Fe<sub>3</sub>O<sub>4</sub>@SiO<sub>2</sub>@ZnO</b>      | -24.4                                  | ~2.00                                        | 5.5                       | 30                               | 51           |
| <b>Fe<sub>3</sub>O<sub>4</sub>/SiO<sub>2</sub>/graphene</b> | -27.0                                  | 2.30                                         | 1.5                       | 50                               | 52           |
| <b>Fe<sub>3</sub>O<sub>4</sub>@MnO<sub>2</sub></b>          | -48.5                                  | 4.40                                         | 2.5                       | 60                               | 53           |
| <b>Fe<sub>3</sub>O<sub>4</sub>@Co</b>                       | -20.7                                  | 2.90                                         | 4.0                       | 60                               | 54           |
| <b>Fe<sub>3</sub>O<sub>4</sub>@CuSiO<sub>3</sub></b>        | -34.8                                  | 5.10                                         | 1.5                       | 70                               | 55           |
| <b>Fe<sub>3</sub>O<sub>4</sub>@SnO<sub>2</sub></b>          | -27.38                                 | 2.1                                          | 4.0                       | 80                               | 56           |
| <b>FFmSR</b>                                                | -66.24                                 | 5.31                                         | 1.79                      | 70                               | This work    |
